# Supplementary material for: Harnessing CAR T-cell Insights to Develop Treatments for Hyperinflammatory Responses in Patients with COVID-19
Source: Oxford University Press journal article supplement (doi:10.1158/2159-8290.cd-20-0473), 2020-04-17
Supplement: 21598290cd200473-sup-241154_0_supp_6226302_q8vd8h.docx [file 21598290cd200473-sup-241154_0_supp_6226302_q8vd8h.docx]

**Supplemental Table. Examples of therapies used for HLH and MAS.**

| **Target** | **Therapeutic Mechanism** | **Example** |
| --- | --- | --- |
| Lymphocyte/macrophage | cytotoxicity | Etoposide, alemtuzumab |
| Corticosteroids | Numerous immunosuppressive | Dexamethasone |
| T cell inhibition | Cytokine inhibition | Cyclosporine, tacrolimus |
| IL-1 | IL-1 receptor antagonist | Anakinra, canakinumab |
| IL-6 | Sink for IL-6 | Siltuximab |
| IL-6R | IL-6 receptor antagonist | Tocilizumab |
| CD28 | CTLA4-Ig | Abatacept, belatacept |
| JAK1/2/3 | JAK inhibitor | Tofacitinib, baricitinib, ruxolitinib |
